# Supplementary material
Source: PubMed Central journal article supplement (PMC3618610)
Supplement: NIHMS412474-supplement-01.pdf [file NIHMS412474-supplement-01.pdf]

# Ocular Hypertension Treatment Study Group

## *Clinical Investigators*

### **Arizona**

Steven H. Cobb, MD  
Mayo Clinic Scottsdale  
13400 East Shea Blvd.  
Scottsdale, AZ 85259

Jackie J. Jacobsen  
Mayo Clinic Scottsdale  
13400 East Shea Blvd.  
Scottsdale, AZ 85259

### **California**

Richard S. Baker, MD  
Charles R. Drew University  
12021 South Wilmington Avenue  
Los Angeles, CA 90059

Fermin P. Ballesteros, Jr  
University of California, San Francisco  
8 Koret Way, Room U507  
San Francisco, CA 94143

James D. Brandt, MD  
UC Davis Department of Ophthalmology  
4860 Y Street, Suite 2400  
Sacramento, CA 95817

Jeffrey J. Casper, MD  
UC Davis Department of Ophthalmology  
4860 Y Street, Suite 2400  
Sacramento, CA 95817

Anne L. Coleman, MD, PhD  
Jules Stein Eye Institute, UCLA  
100 Stein Plaza  
Los Angeles, CA 90024

Michael V. Drake, MD  
University of California, San Francisco  
Office of the President  
1111 Franklin Street, 11th Floor  
Oakland, CA 94607

Margarita X. Gonzalez  
Jules Stein Eye Institute, UCLA  
100 Stein Plaza  
Los Angeles, CA 90024

Simon K. Law, MD, PharmD  
Jules Stein Eye Institute, UCLA  
100 Stein Plaza  
Los Angeles, CA 90024

Michele C. Lim, MD  
UC Davis Department of Ophthalmology  
4860 Y Street, Suite 2400  
Sacramento, CA 95817

Shan C. Lin, MD  
University of California, San Francisco  
Department of Ophthalmology  
533 Parnassus Street, Room 507>  
San Francisco, CA 94143

Ivan R. Schwab, MD  
UC Davis Department of Ophthalmology  
4860 Y Street, Suite 2400  
Sacramento, CA 95817

J. Rigby Slight, MD  
University of California, San Diego  
530 Lomas Santa Fe Drive, #8  
Solana Beach, CA 92075

Robert L. Stamper, MD  
University of California, San Francisco  
Department of Ophthalmology  
533 Parnassus Street, Room 507  
San Francisco, CA 94143

Patricia W. Tam  
University of California, San Francisco  
8 Koret Way, Room U507  
San Francisco, CA 94143

Robert N. Weinreb, MD  
University of California, San Diego  
Department of Ophthalmology  
9500 Gilman Drive  
La Jolla, CA 92093

Eunice Williams-Steppe, MA  
University of California, San Diego  
Department of Ophthalmology  
9500 Gilman Drive  
La Jolla, CA 92093

## **Washington, DC**

Frank S. Ashburn, MD  
Eye Associates of Washington, DC  
4910 Massachusetts NW, Suite 21  
Washington, DC 20016

Clete C. Clark  
Washington Eye Associates, Physicians & Surgeons  
5454 Wisconsin Avenue, Suite 950  
Chevy Chase, MD 20815

Douglas E. Gaasterland, MD  
Eye Doctors of Washington  
2 Wisconsin Circle, Suite 200  
Chevy Chase, MD 20815

Linda A. Manier  
Eye Doctors of Washington  
2 Wisconsin Circle, Suite 200  
Chevy Chase, MD 20815

Karen D. Schacht  
Eye Associates of Washington, DC  
4910 Massachusetts NW, Suite 21  
Washington, DC 20016

Arthur L. Schwartz, MD  
Washington Eye Associates, Physicians & Surgeons  
5454 Wisconsin Avenue, Suite 950  
Chevy Chase, MD 20815

Howard S. Weiss, MD  
Washington Eye Associates, Physicians & Surgeons  
5454 Wisconsin Avenue, Suite 950  
Chevy Chase, MD 20815

## **Florida**

Donald L. Budenz, MD  
University of Miami School of Medicine  
Bascom Palmer Eye Institute  
900 NW 17th Street  
Miami, FL 33136

Francisco E. Fantes, MD  
University of Miami School of Medicine  
Bascom Palmer Eye Institute  
900 NW 17th Street  
Miami, FL 33136

Steven J. Gedde, MD  
University of Miami School of Medicine  
Bascom Palmer Eye Institute  
900 NW 17th Street  
Miami, FL 33136

Richard K. Parrish, MD  
University of Miami School of Medicine  
Bascom Palmer Eye Institute  
900 NW 17th Street  
Miami, FL 33136

## Georgia

Allen D. Beck, MD  
Emory University Eye Center  
1365B Clifton Road  
Atlanta, GA 30322

Anastasios P. Costarides, MD, PhD  
Emory University Eye Center  
1365B Clifton Road  
Atlanta, GA 30322

Donna Leef  
Emory University Eye Center  
1365B Clifton Road  
Atlanta, GA 30322

Thomas S. Harbin, MD  
Eye Consultants of Atlanta  
95 Collier Road NW, Suite 3000  
Atlanta, GA 30309

Lea M. Danner  
Eye Physicians & Surgeons  
1457 Scott Blvd  
Decatur, GA 30030

Teresa A. Long  
Eye Consultants of Atlanta  
95 Collier Road NW, Suite 3000  
Atlanta, GA 30309

Paul McManus, MD  
Eye Physicians & Surgeons  
1457 Scott Blvd  
Decatur, GA 30030

Charles J. Patorgis, OD  
Eye Consultants of Atlanta  
95 Collier Road NW, Suite 3000  
Atlanta, GA 30309

Shelly R. Smith  
Eye Physicians & Surgeons  
1457 Scott Blvd  
Decatur, GA 30030

Julie M. Wright  
Eye Consultants of Atlanta  
95 Collier Road NW, Suite 3000  
Atlanta, GA 30309

## **Kentucky**

Joern B. Soltau, MD  
University of Louisville  
Department of Ophthalmology  
301 East Muhammad Ali Boulevard  
Louisville, KY 40292

Judit M. Ambrus  
University of Louisville  
Department of Ophthalmology  
301 East Muhammad Ali Boulevard  
Louisville, KY 40292

## **Maryland**

Donald A. Abrams, MD  
Krieger Eye Institute  
Sinai Hospital of Baltimore  
2411 West Belvedere Avenue  
Baltimore, MD 21215

Sameer I. Ahmad, MD  
Johns Hopkins School of Medicine  
Department of Ophthalmology  
600 North Wolfe Street, Maumenee 809  
Baltimore, MD 21287

David S. Friedman, MD, MPH  
Johns Hopkins School of Medicine  
Department of Ophthalmology  
600 North Wolfe Street, Maumenee 809  
Baltimore, MD 21287

Ramzi Hemady, MD  
Maryland Center for Eye Care Associates  
22 S. Greene Street, Rm N6W45  
Baltimore, MD 21201

Eve J. Higginbotham, MD  
Maryland Center for Eye Care Associates  
22 S. Greene Street, Rm N6W45  
Baltimore, MD 21201

Henry D. Jampel, MD  
Johns Hopkins School of Medicine  
Department of Ophthalmology  
600 North Wolfe Street, Maumenee 809  
Baltimore, MD 21287

Irvin P. Pollack, MD  
Krieger Eye Institute  
Sinai Hospital of Baltimore  
2411 West Belvedere Avenue  
Baltimore, MD 21215

Kevin L. Powdrill  
Maryland Center for Eye Care Associates  
22 S. Greene Street, Rm N6W45  
Baltimore, MD 21201

Harry A. Quigley, MD  
Johns Hopkins School of Medicine  
Department of Ophthalmology  
600 North Wolfe Street, Maumenee 809  
Baltimore, MD 21287

Pradeep Y. Ramulu, MD  
Johns Hopkins School of Medicine  
Department of Ophthalmology  
600 North Wolfe Street, Maumenee 809  
Baltimore, MD 21287

Alan L. Robin, MD  
6115 Falls Road, Third Floor  
Baltimore, MD 21209

Donald J. Zack, MD, PhD  
Johns Hopkins School of Medicine  
Department of Ophthalmology  
600 North Wolfe Street, Maumenee 809  
Baltimore, MD 21287

## **Michigan**

Juan L. Allen  
Kresge Eye Institute  
Wayne State University  
4717 St. Antoine Boulevard  
Detroit, MI 48201

Monica Y. Allen-Alexander, MD  
Kresge Eye Institute  
Wayne State University  
4717 St. Antoine Boulevard  
Detroit, MI 48201

Terry J. Bergstrom, MD  
WK Kellogg Eye Center  
University of Michigan  
1000 Wall Street  
Ann Arbor, MI 48105

David A. Crandall, MD  
Henry Ford Medical Center - Troy  
Department of Ophthalmology  
2825 Livernois  
Troy, MI 48083

Deborah Darnley-Fisch, MD  
Henry Ford Medical Center - Fairlane  
Department of Ophthalmology  
19401 Hubbard Drive  
Dearborn, MI 48126

Aldo Fantin, MD  
Henry Ford Medical Center - Troy  
Department of Ophthalmology  
2825 Livernois  
Troy, MI 48083

Melanie Gutkowski  
Henry Ford Medical Center - Troy  
Department of Ophthalmology  
2825 Livernois  
Troy, MI 48083

Julianne Hall  
Henry Ford Medical Center  
Department of Ophthalmology  
2799 W. Grand  
Detroit, MI 48202

Bret A. Hughes, MD  
Kresge Eye Institute  
Wayne State University  
4717 St. Antoine Boulevard  
Detroit, MI 48201

Nauman R. Imami, MD  
Henry Ford Medical Center  
Department of Ophthalmology  
2799 W. Grand  
Detroit, MI 48202

Mark S. Juzych, MD  
Kresge Eye Institute  
Wayne State University  
4717 St. Antoine Boulevard  
Detroit, MI 48201

Mark L. McDermott, MD  
Kresge Eye Institute  
Wayne State University  
4717 St. Antoine Boulevard  
Detroit, MI 48201

Sy E. Moroi, MD, PhD  
WK Kellogg Eye Center  
University of Michigan  
1000 Wall Street  
Ann Arbor, MI 48105

John M. O'Grady, MD  
Kresge Eye Center  
Great Lakes Ophthalmology  
2393 Schust  
Saginaw, MI 48603

Carol J. Pollack-Rindle  
WK Kellogg Eye Center  
University of Michigan  
1000 Wall Street  
Ann Arbor, MI 48105

John M. Ramocki, MD  
Kresge Eye Institute  
Wayne State University  
4717 St. Antoine Boulevard  
Detroit, MI 48201

Michelle A. Tehranisa  
WK Kellogg Eye Center  
University of Michigan  
1000 Wall Street  
Ann Arbor, MI 48105

Linda A. Van Conett  
Kresge Eye Center  
Great Lakes Ophthalmology  
2393 Schust  
Saginaw, MI 48603

## **Minnesota**

David C. Herman, MD  
Mayo Foundation  
200 First Street SW  
Rochester, MN 55905

Rebecca A. Nielsen, LPN  
Mayo Foundation  
200 First Street SW  
Rochester, MN 55905

## **Missouri**

Edward Barnett, MD  
Washington University Medical Center  
Department of Ophthalmology & Visual Sciences  
660 South Euclid Avenue, Campus Box 8096  
St. Louis, MO 63110

Benard Becker, MD  
Washington University Medical Center  
Department of Ophthalmology & Visual Sciences  
660 South Euclid Avenue, Campus Box 8096  
St. Louis, MO 63110



Anjali M. Borade, MD  
Washington University Medical Center  
Department of Ophthalmology & Visual Sciences  
660 South Euclid Avenue, Campus Box 8096  
St. Louis, MO 63110

Jamie D. Kambarian  
Washington University Medical Center  
Department of Ophthalmology & Visual Sciences  
660 South Euclid Avenue, Campus Box 8096  
St. Louis, MO 63110

Michael A. Kass, MD  
Washington University Medical Center  
Department of Ophthalmology & Visual Sciences  
660 South Euclid Avenue, Campus Box 8096  
St. Louis, MO 63110

Carla J. Siegfried, MD  
Washington University Medical Center  
Department of Ophthalmology & Visual Sciences  
660 South Euclid Avenue, Campus Box 8096  
St. Louis, MO 63110

## **New York**

Yokasta E. Abreu, MD  
New York Eye Ear Infirmary  
310 East 14th Street  
New York, NY 10003

Jeffrey M. Liebmann, MD  
New York Eye Ear Infirmary  
310 East 14th Street  
New York, NY 10003

Robert Ritch, MD  
New York Eye Ear Infirmary  
310 East 14th Street  
New York, NY 10003

Celso A. Tello, MD  
New York Eye Ear Infirmary  
310 East 14th Street  
New York, NY 10003

## **Ohio**

N. Douglas Baker, MD  
Ophthalmology Surgeons Consultants  
262 Neil Avenue, Suite 410  
Columbus, OH 43215

Robert J. Derick, MD  
Ohio State University  
Havener Eye Institute  
915 Olentangy River Road  
Columbus, OH 43212

Kathleen A. Lamping, MD  
University Suburban Health Center  
1611 South Green, Suite 306A  
South Euclid, OH 44121

Kathryne McKinney  
Ohio State University  
Havener Eye Institute  
915 Olentangy River Road  
Columbus, OH 43212

Cheryl Vitelli  
University Suburban Health Center  
1611 South Green, Suite 306A  
South Euclid, OH 44121

Paul A. Weber, MD  
Ohio State University  
Havener Eye Institute  
915 Olentangy River Road  
Columbus, OH 43212

## **Oregon**

George (Jack) A. Cioffi, MD  
Devers Eye Institute  
Legacy Portland Hospitals  
1040 NW 22nd Avenue, Suite 200  
Portland, OR 97210

Steven L. Mansberger, MD  
Devers Eye Institute  
Legacy Portland Hospitals  
1040 NW 22nd Avenue, Suite 200  
Portland, OR 97210

## **Pennsylvania**

G. Richard Bennett, MS, OD  
Pennsylvania College of Optometry  
1200 West Godfrey Avenue  
Philadelphia, PA 19141

Sheri G. Drossner  
Scheie Eye Institute  
University of Pennsylvania  
51 North 39th Street  
Philadelphia, PA 19104

Joan C. DuPont  
Scheie Eye Institute  
University of Pennsylvania  
51 North 39th Street  
Philadelphia, PA 19104

Eydie G. Miller-Ellis, MD  
Scheie Eye Institute  
University of Pennsylvania  
51 North 39th Street  
Philadelphia, PA 19104

Jane F. Niemczyk  
Glaucoma Care Clinic.  
Philadelphia, PA 19007

Jody R. Piltz-Seymour, MD  
Glaucoma Care Clinic  
Philadelphia, PA 19007

Prithvi S. Sankar, MD  
Scheie Eye Institute  
University of Pennsylvania  
51 North 39th Street  
Philadelphia, PA 19104

## **Texas**

Peter T. Chang, MD  
Baylor Eye Clinic  
Baylor College of Medicine  
6560 Fannin, Suite 2200  
Houston, TX 77030

Pamela M. Frady  
Baylor Eye Clinic  
Baylor College of Medicine  
6560 Fannin, Suite 2200  
Houston, TX 77030

Ronald L. Gross, MD  
Baylor Eye Clinic  
Baylor College of Medicine  
6560 Fannin, Suite 2200  
Houston, TX 77030

Silvia Orengo-Nania, MD  
Baylor Eye Clinic  
Baylor College of Medicine  
6560 Fannin, Suite 2200  
Houston, TX 77030
